# Supplementary material for: Upregulated MicroRNA-25 Mediates the Migration of Melanoma Cells by Targeting DKK3 through the WNT/β-Catenin Pathway
Source: PubMed Central journal article supplement (PMC5133768; doi:10.3390/ijms17111124), 2016-10-27
Supplement: ijms-17-01124-s001.pdf [file ijms-17-01124-s001.pdf]

# Supplementary Materials: Upregulated MicroRNA-25 Mediates the Migration of Melanoma Cells by Targeting DKK3 through the WNT/ $\beta$ -Catenin Pathway

Jia Huo, Yanfei Zhang, Ruilian Li, Dingwei Zhang and Jiawen Wu

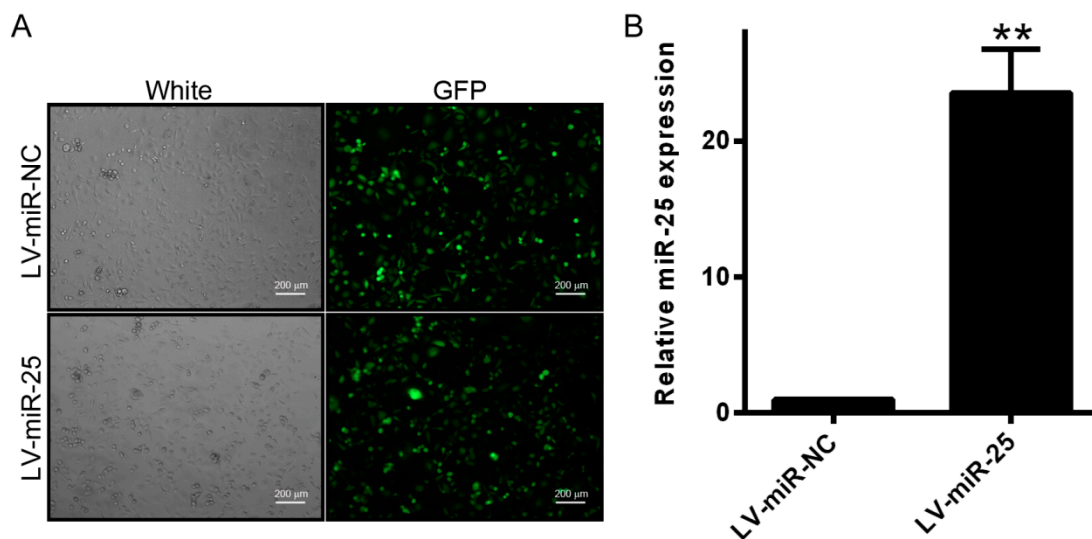

**Figure S1.** Efficient transfection of lentivirus in A375 cells was shown by using fluorescent microscopy. (A) The black and green pictures showed the cells in the same field under normal white light and fluorescence light, respectively. GFP, green fluorescent protein; (B) quantitative real-time polymerase chain reaction (qRT-PCR) was used to evaluate relative expression of miR-25 in A375 cells transfected with lentivirus LV-miR-25 or LV-miR-NC. The average miRNA expression in LV-miR-NC group was designated as 1. \*\*  $p < 0.01$ .
